# Supplementary material
Source: PubMed Central journal article supplement (PMC4640117)

## SUPPLEMENTARY DATA

**Fig. S1.** Leaf Senescence of *Morus* sp. at Arnold Arboretum on 22<sup>nd</sup> November 2011.

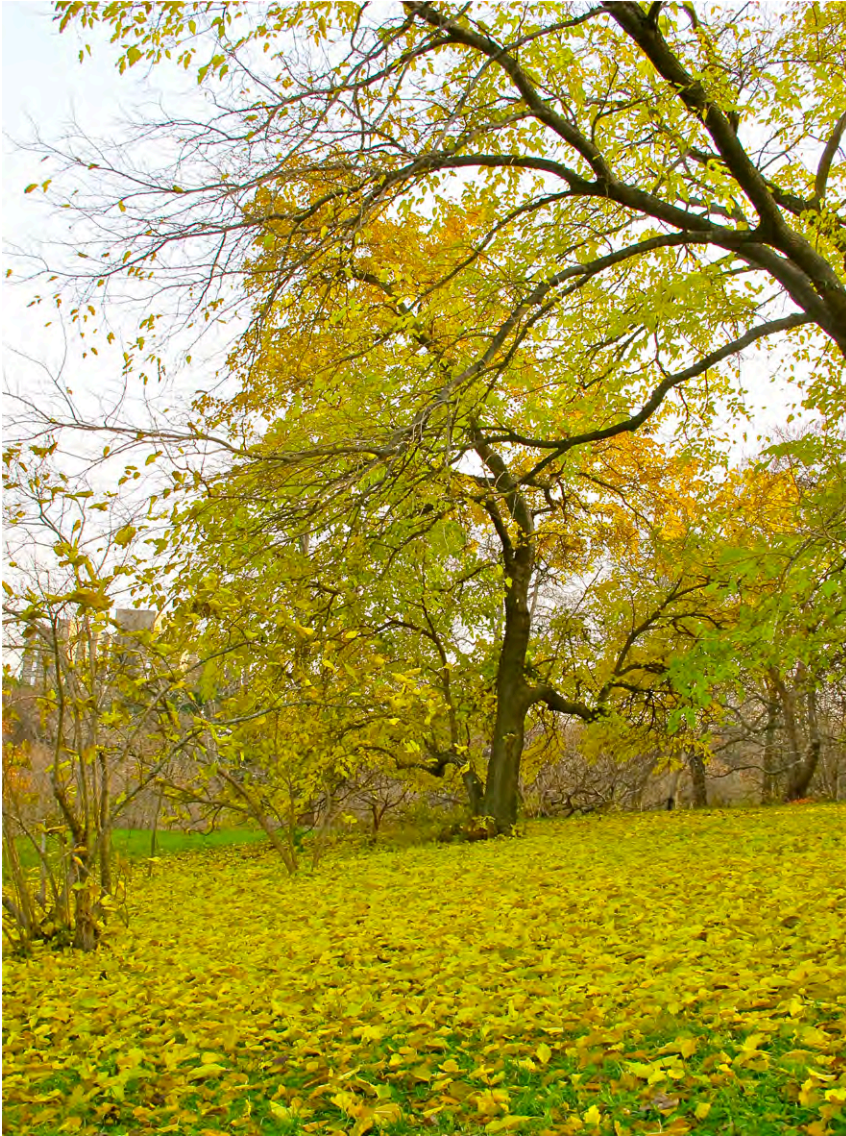

**Fig. S2.** Leaf Senescence of *Orixia* sp. at Arnold Arboretum on 12<sup>th</sup> November 2011.

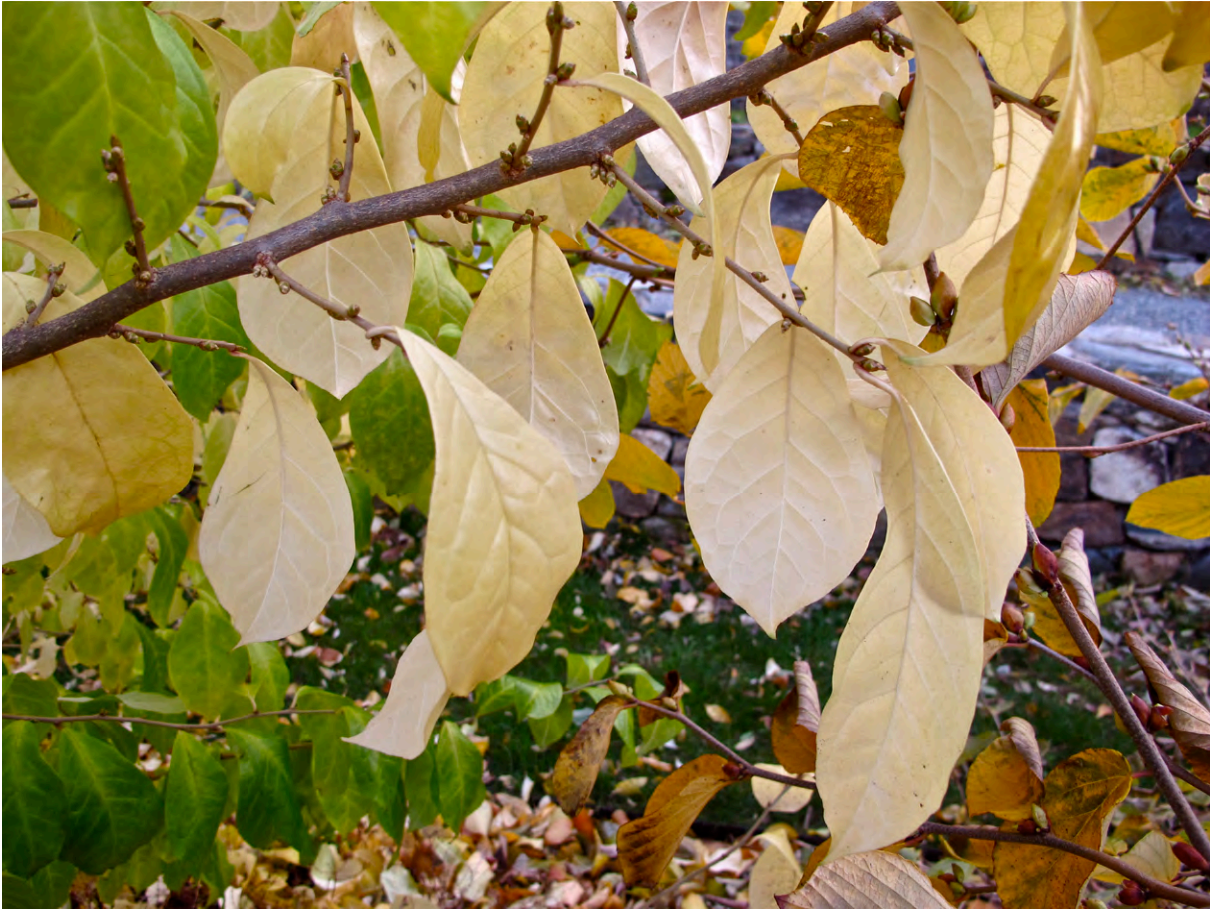

**Fig. S3.** Leaf Senescence of *Prunus sargentii* at Arnold Arboretum on 22<sup>nd</sup> October 2011.

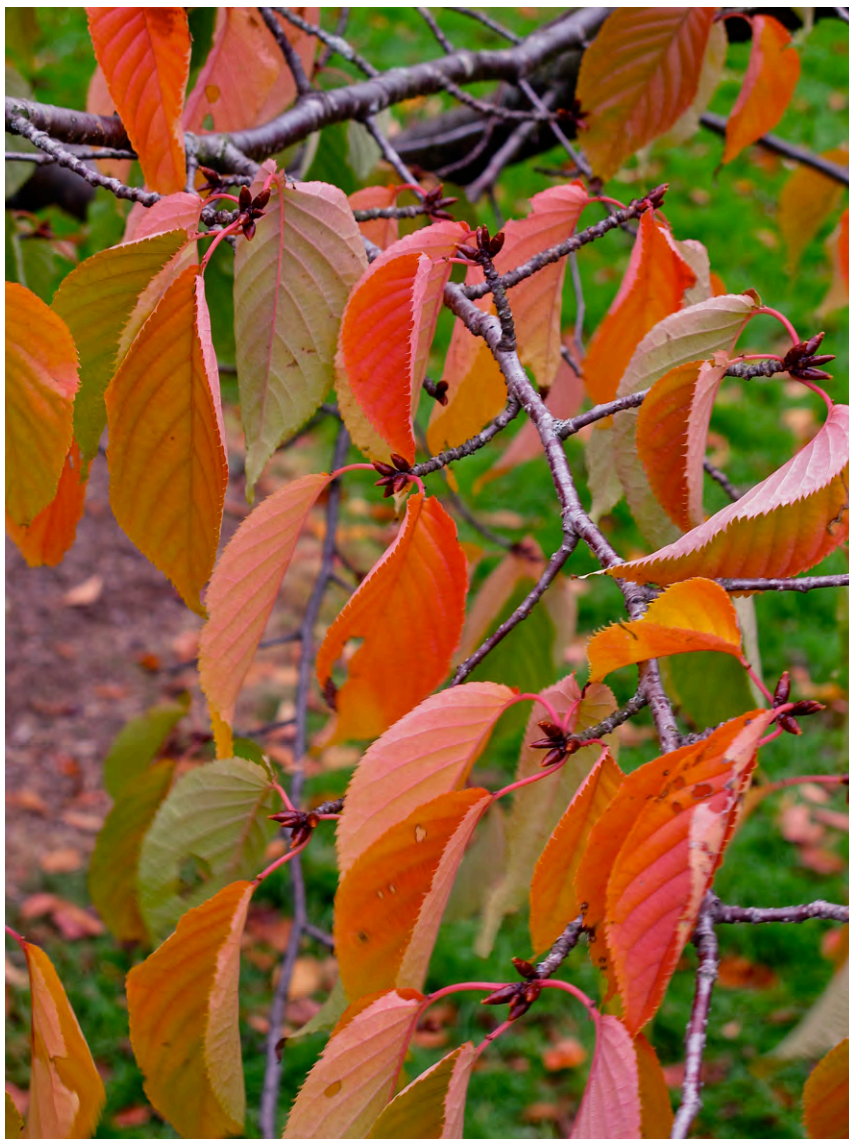

Supplement: supp_mcv015_aob-14822-s01.pdf [file supp_mcv015_aob-14822-s01.pdf]
